# Supplementary material for: A factorial randomised controlled trial to identify efficacious self-regulation techniques in an e- and m-health intervention to target an active lifestyle: study protocol
Source: PubMed Central journal article supplement (PMC6558816; doi:10.1186/s13063-019-3456-7), 2019-06-10
Supplement: 13063_2019_3456_MOESM1_ESM.pdf [file 13063_2019_3456_MOESM1_ESM.pdf]

## Myplan 2.0. Screenshots of the website

Figure 1a. Defining an action in the action planning module: “how will I do it?”

 **Mijn Actieplan**  

Oké Helene, je bent nu klaar om een actieplan op te stellen over hoe je meer wil bewegen! Vul hier dus niet in wat je al doet, maar stel een plan op voor hoe jij extra zal bewegen!

Hoe zou jij graag meer willen bewegen?  
*Kies voor deze eerste keer één domein waarin je graag meer wil bewegen, dat maakt het behalen van je doel gemakkelijker.*

- Door te bewegen of sporten in mijn vrije tijd (bv. gaan joggen, wandelen, zwemmen, ...)
- Door meer te bewegen tijdens het huishouden, het werken in de tuin, ...
- Door meer te bewegen op en rond het werk/vrijwilligerswerk.
- Door me meer actief te verplaatsen (bv. met de fiets of te voet naar de winkel, het werk, ...).

*Fleur ( 25 jaar ) vertelt:*  
*"Ik vind het belangrijk om meer te bewegen, maar ik ben echt geen sportpersoon. Sinds ik echter te voet al mijn boodschappen doe, voel ik me minder vaak moe!"*

The text in red is a succes story.

Figure 1b. Defining an action in the action planning module: “What will I do?” “When will I do it?”

“Where will I do it?”

 **Mijn Actieplan**  

Wat wil jij doen als beweging in je vrije tijd (bv. joggen, fietsen, zwemmen, wandelen, ...)?



Figure 1c. The coping planning module: potential hindrances.

 **Mijn Actieplan**  

Een nieuw plan naleven is niet steeds gemakkelijk. Onderzoek toont aan dat het enorm belangrijk is om vooraf over mogelijke hindernissen na te denken. Wanneer deze hindernis zich dan daadwerkelijk voordoet, zal je meteen een oplossing voor de hand hebben!

Wat zou voor jou de belangrijkste hindernis zijn om meer te bewegen?



- Ik vrees dat ik mijn voornemen zal vergeten uitvoeren
- Het zou kunnen dat ik er op het moment zelf geen zin in heb
- Er kan iets anders tussenkomen (bv. een familiebezoekje, een onverwachte taak)
- Slecht weer
- Andere:

Translation: "Living up to a new plan is not always easy. Research shows that it is really important to consider potential hindrances in advance. When this hindrance appears, you will have an immediate solution at hand!"

Figure 1d. The coping planning module: possible solutions for hindrances.

 **Mijn Actieplan**  

Wat zou voor jou een oplossing kunnen zijn hiervoor?

- Ik zal een motiverende foto of quote ophangen op een zichtbare plaats.
- Ik zoek iemand die met me meedoet of me aanmoedigt (partner, vriend, iemand uit de buurt ...).
- Andere:

**Ella ( 26 jaar ) vertelt:**

*"Ik vind gaan sporten echt niet leuk, maar als ik naar de foto van mijn droomjurk kijk, weet ik waarom ik het doe en zet ik de stap wel."*

The text in red is a success story.

Figure 1e. Example of a quiz question



# Mijn Actieplan



3. Is de volgende stelling juist of fout?

"Mensen die meer bewegen, hebben ook meer kans op spier- en gewrichtsklachten."

Juist

Fout

Vorige Volgende

Translation: "Is the following statement true or false? If you move more, you will have more chance to develop muscle and joint pain"

Figure 2f. Solution and information of the quiz question



# Mijn Actieplan





Inderdaad!  
Beweging verlaagt net je kans op spier- en gewrichtsklachten. Zolang je je niet waagt aan extreme sporten en je goed opbouwt natuurlijk...

Een woordje uitleg:

- Studies bij meer dan 2000 werkende mensen tonen aan dat vooral een gebrek aan beweging de kans op rugpijn, nekklachten, ... verhoogt.
- Deze studies tonen ook aan dat bewegen of sporten klachten kan geven, maar dan enkel bij hoge intensiteit.
- Het zal dus belangrijk zijn beweging te zoeken die bij je past en te beginnen met kleine veranderingen.

Volgende

Translation: "Your answer was correct! More movement will reduce your chance on muscle and joint pain"
