# Supplementary material for: A factorial randomised controlled trial to identify efficacious self-regulation techniques in an e- and m-health intervention to target an active lifestyle: study protocol
Source: PubMed Central journal article supplement (PMC6558816; doi:10.1186/s13063-019-3456-7), 2019-06-10
Supplement: 13063_2019_3456_MOESM3_ESM.pdf [file 13063_2019_3456_MOESM3_ESM.pdf]

# Data Management Plan

---

## 1 Information about the data that will be collected or used

### 1.1 Description of the data that will be collected

In this study, a large RCT (ecological randomised controlled trial) will be executed to test the effectiveness of 'MyPlan 2.0' to alter the levels of physical activity and sedentary behaviour of adults. Participants will be measured one week before the intervention (PRE), during the intervention (after session 1 (T1) and after session 3 (T2)), maximum one week after the intervention (POST) and one month after the intervention (FU). Validated questionnaires will be used to assess self-reported physical activity and sedentary behaviour (e.g. IPAQ, SIT-Q-7d) and participants' psychosocial determinants for change (attitude, intention,...).

### 1.2 File formats that will be used

Website data (collected via LifeGuide software) and data from the mobile app application will be extracted in Excel files and then stored in the one SPSS file. All data from the self-reported questionnaires (collected via <https://www.limesurvey.org/>) will also be extracted in Excel files and stored in one SPSS file. All data collected during each of the 5 measurement time points will be stored in three SPSS documents, one document per measurement time point. After finalization of the data collection, data will be grouped in one SPSS file to conduct statistical analysis.

### 1.3 Documentation of the data

- **Study level documentation:**

All contextual information, such as background, information about the research design, context of data collection, etc. will be documented in a study protocol, that will be updated regularly.

- **Data level documentation:**

An excel file inventory of the datasets will be made to list all the datasets and to document the relationships between the different datasets. Names of the SPSS files, containing the different datasets, will also be documented in this inventory.

Variable labels will be defined and stored in SPSS itself, where the data is stored and analyzed. All information about the variables included in these datasets will also be gathered in an excel codebook. The codebook will contain variable names, labels, codes, classification, abbreviations, item information, missing data codes, etc.

The steps that were taken to structure and analyze these data will be documented in a logbook.

#### **1.4 Risks and potential difficulties during data collection and processing**

It is important to have enough data to conduct the analyses. To avoid drop out, the intervention will be made as engaging as possible, but users not logging in for following sessions will be called by one of the researchers. To make sure that the measures are reliable and valid, we will make use of validated questionnaires. All data collected will be checked for missing values and loss of information. When designing a study we will always adhere to standard protocols and previous studies.

#### **1.5 Data storage**

To prevent loss, all data will be stored at the provided central storage infrastructure ("central share") of Ghent University, where the data are secure. Once retrieved, data will be deleted from recording devices and survey servers.

#### **1.6 Back-up of the data**

The central share of Ghent University, where all data will be stored, provides daily automated back-ups. On the share "snapshots" of the data are made. Snapshots allow you to retrieve (older versions of) files. To retrieve previous versions you can go back 15 weeks in total, based on 5 weeks of daily snapshots and 15 weeks of weekly snapshots.

#### **1.7 Data security?**

All computers are provided with personal passwords and are weekly scanned for malware. Digital files will be coded, using participant codes instead of names. Only the researcher and the promoters will have access to a file containing the links between the codes and the personal data of the participants (name, address, etc.). All data will be stored at the central storage infrastructure of Ghent University and are therefore automatically protected. When destroying files after digitalizing them, we will make sure this is done properly by a shredder. Paper documents can also be collected and destroyed at university level.

#### **1.8 Data access**

All researchers from our research team (three PhD students, one post-doctoral researcher and two promoters) will have access to the data. During this study master students will be involved in the data collection and will get access to (part of) the data as well. Therefore they will sign a declaration of confidentiality.

## **2 Ethical Issues**

### **2.1 Data collection, storage, processing and archiving**

The ethical guidelines will be taken into account for this study. Participants will be informed on every aspect of the study that concerns their participation (e.g. data collection and storage, anonymization, etc.) and give written informed consent for their participation. All the data will be stored and processed confidentially, in accordance with the Belgian Law of 8 December 1992 on the protection of privacy in relation to the processing of personal data, the Belgian law of 22 August 2002 on the rights of patients, and the European regulation of 14 April 2016 on data protection. This study was approved by the Committee of Medical Ethics of the Ghent University hospital (Belgian registration number: B670201731996) and registered as clinical trial on <https://register.clinicaltrials.gov> (ID

number: NCT03274271)

## **2.2 Data sharing**

All participants receive an information letter in which ethical and privacy consequences will be explained. Data will only be accessible to the persons described above. If (parts of) datasets are shared with other researchers, all shared data will be anonymized. Only the researcher and the promoters (and research assistants when they recruited the participants) will have the rights to link the data to the participants.
